# Supplementary material for: Natural iron embedded hierarchically porous carbon with thin–thickness and high-efficiency microwave absorption properties
Source: Royal Society of Chemistry journal article supplement (doi:10.1039/d0ra07963d), 2020-01-01
Supplement: d0ra07963d1.pdf [file d0ra07963d1.pdf]

## Supporting Information

# Natural iron embedded hierarchically porous carbon with thin-thickness and high-efficiency microwave absorption properties

Can Zhang,<sup>1a</sup> Kuihu Zhao,<sup>1a</sup> Xueai Li,<sup>\*a</sup> Wenqi Dong,<sup>a</sup> Sufeng Wang,<sup>a</sup> Yunchun Zhou<sup>b</sup> and Haiyan Wang<sup>\*a</sup>

<sup>a</sup> *Hebei Key Laboratory of Applied Chemistry, Hebei Key Laboratory of heavy metal deep-remediation in water and resource reuse, College of Environment and Chemical Engineering, Yanshan University, Qinhuangdao 066004, P.R. China*

<sup>b</sup> *National Analytical Research Center of Electrochemical and Spectroscopy, Changchun Institute of Applied Chemistry, Chinese Academy of Sciences, Changchun 130022, P.R. China*

<sup>1</sup> These authors contributed to the work equally and should be regarded as co-first authors.

\*Corresponding authors. E-mail address: [lixueai@ysu.edu.cn](mailto:lixueai@ysu.edu.cn)(X. Li), [hywang@ysu.edu.cn](mailto:hywang@ysu.edu.cn)(H. Wang)

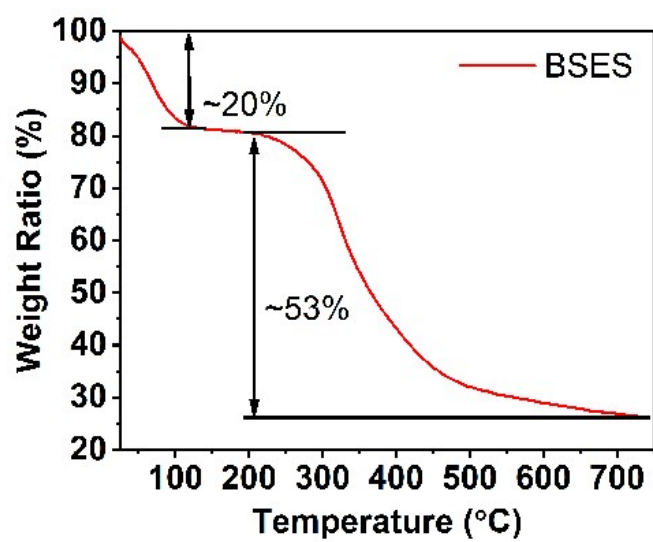

Fig. S1 TG curve of raw BSES.

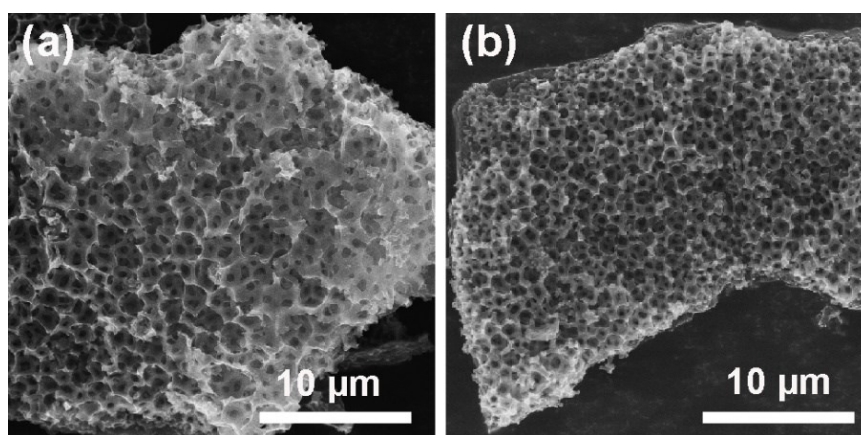

Fig. S2 FESEM images of (a) HPC-0.5, and (b) HPC-2.

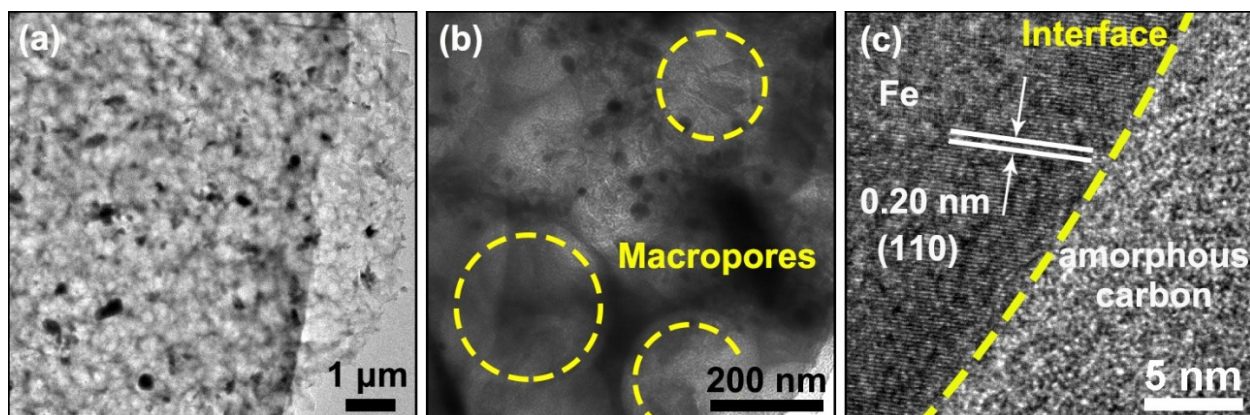

**Fig. S3.** (a) Low-magnification, (b) high-magnification TEM images, and (c) HRTEM image of HPC-1.

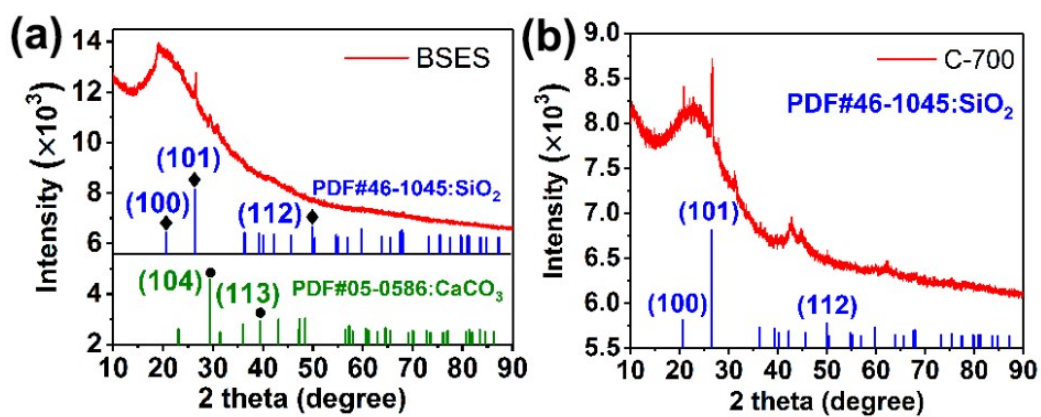

**Fig. S4** XRD patterns of (a) raw BSES, and (b) C-700, respectively.

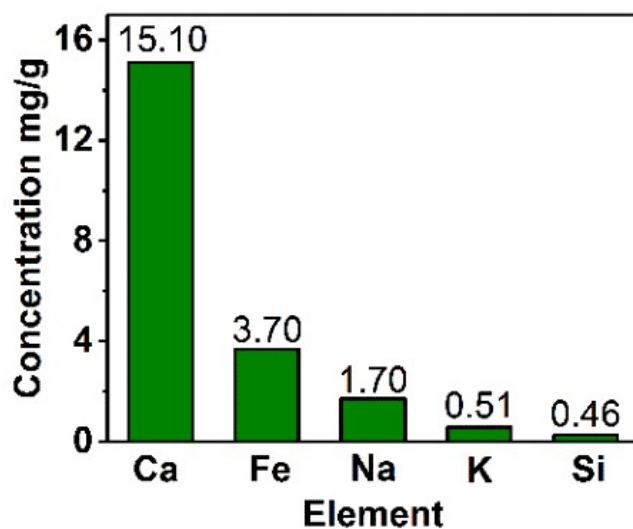

Fig. S5. The data of ICP-AES measurement of raw BSES.

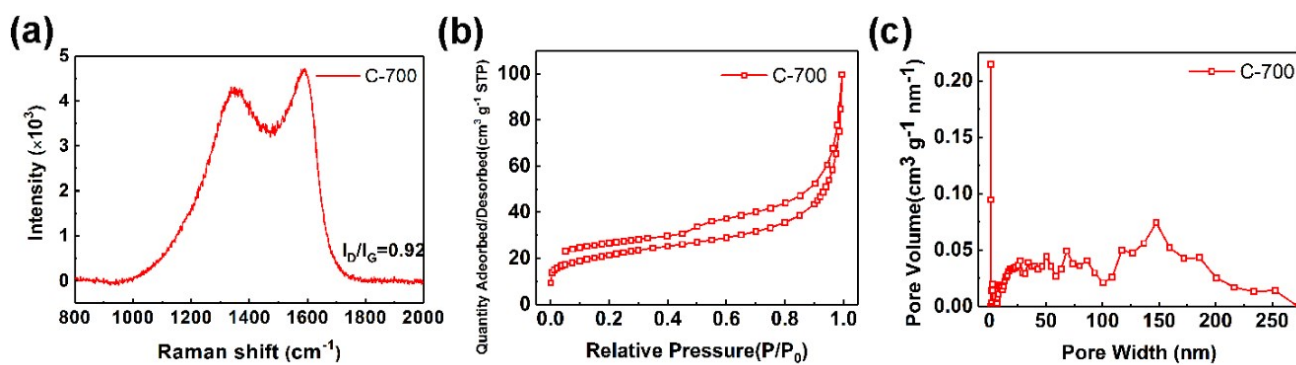

Fig. S6 (a) Raman spectrum, (b) Nitrogen adsorption–desorption isotherm, and (c) pore size distribution of C-700.

**Table S1.** The pore structure parameters of C700 and HPCs.

| Sample  | $S_{\text{BET}}$<br>( $\text{m}^2/\text{g}$ ) | $S_{\text{Micro}}$<br>( $\text{m}^2/\text{g}$ ) | $S_{\text{External}}$<br>( $\text{m}^2/\text{g}$ ) | $S_{\text{Micro}}/S_{\text{BET}}$<br>(%) | $V_{\text{Total}}$<br>( $\text{cm}^3/\text{g}$ ) | $V_{\text{Micro}}$<br>( $\text{cm}^3/\text{g}$ ) | $V_{\text{Micro}}/V_{\text{Total}}$<br>(%) |
|---------|-----------------------------------------------|-------------------------------------------------|----------------------------------------------------|------------------------------------------|--------------------------------------------------|--------------------------------------------------|--------------------------------------------|
| C700    | 73.43                                         | 19.47                                           | 53.96                                              | 26.52                                    | 0.15                                             | 0.01                                             | 6.67                                       |
| HPC-0.5 | 553.60                                        | 459.89                                          | 93.71                                              | 83.07                                    | 0.34                                             | 0.24                                             | 70.59                                      |
| HPC-1   | 1192.00                                       | 972.50                                          | 219.50                                             | 81.59                                    | 0.71                                             | 0.52                                             | 73.24                                      |
| HPC-2   | 1886.16                                       | 1231.82                                         | 654.34                                             | 65.31                                    | 0.92                                             | 0.49                                             | 53.26                                      |

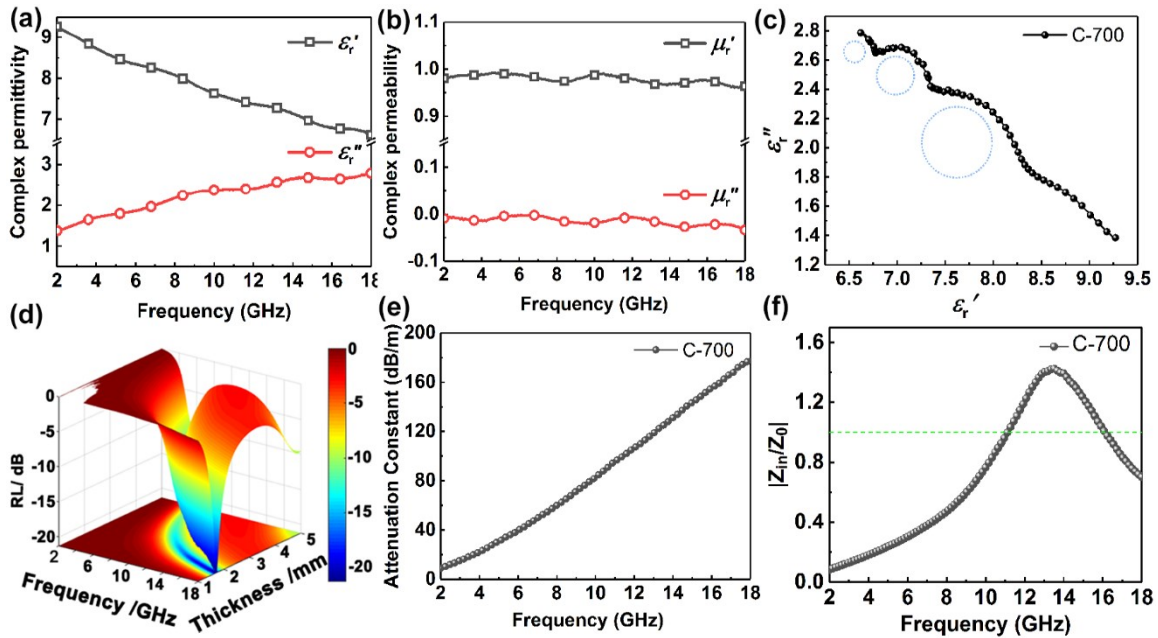

**Fig. S7** Frequency dependence of (a) complex permittivity, (b) complex permeability, (c) three-dimensional map of RL, and (d) attenuation factor for C-700.

**Table S2.** Comparison of the microwave absorption properties of HPC-1 with the recently reported bio-derived absorbers.

| Microwave absorber                           | Minimum RL |             | Effective absorption bandwidth |                      | Ref.   |
|----------------------------------------------|------------|-------------|--------------------------------|----------------------|--------|
|                                              | Value (dB) | $f_m$ (GHz) | $f_b$ /GHz (t/mm)              | Filler loading (wt%) |        |
| Porous carbon                                | -42.4      | 8.88        | 2.24 (1.50)                    | 70                   | 1      |
| 3D porous carbon                             | -44.6      | 9.15        | 2.20 (1.68)                    | 30                   | 2      |
| Porous rGOs                                  | -51.7      | 9.80        | 3.90 (3.50)                    | 15                   | 3      |
| Carbonaceous photonic crystals               | -57.9      | 7.30        | 2.10 (2.50)                    | 30                   | 4      |
| Porous carbon/Fe <sub>3</sub> O <sub>4</sub> | -43.6      | 7.10        | 3.30 (4.70)                    | 30                   | 5      |
| Porous carbon/Fe <sub>3</sub> O <sub>4</sub> | -39.5      | 6.40        | 4.00 (1.60)                    | 50                   | 6      |
| Porous carbon/NiO                            | -33.8      | 16.40       | 2.50 (6.00)                    | 30                   | 7      |
| AC/Ni(OH) <sub>2</sub>                       | -23.0      | 14.50       | 2.00 (5.50)                    | 50                   | 8      |
| Porous carbon/MnO                            | -51.6      | 10.4        | 3.00 (2.47)                    | 30                   | 9      |
| HPC-1 (BSES)                                 | -53.6      | 10.40       | 4.00 (1.43)                    | 20                   | Herein |

## References

- 1 X. Qiu, L. X. Wang, H. L. Zhu, Y. K. Guan and Q. T. Zhang, *Nanoscale*, 2017, **9**, 7408.
- 2 S. K. Singh, H. Prakash, M. J. Akhtar and K. K. Kar, *ACS Sustainable Chem. Eng.*, 2018, **6**, 5381–5393.
- 3 D. Q. Zhang, T. T. Liu, J. Y. Cheng, J. X. Chai, X. Y. Yang, H. Wang, G. P. Zheng and M. S. Cao,

*Nanotechnology*, 2019, **30**, 445708

4 Y. Zhang, B. C. Wang, A. M. Nie, C. P. Mu, J. Y. Xiang, F. S. Wen and Z. Y. Liu, *J. Mater. Sci.*, 2019, **54**, 14343–14353.

5 G. J. Gou, F. B. Meng, H. G. Wang, M. Jiang, W. Wei and Z. W. Zhou, *Nano Res.*, 2019, **12**, 1423–1429.

6 L. H. Wang, H. T. Guan, J. Q. Hu, Q. Huang, C. J. Dong, W. Qian and Y. D. Wang, *J. Alloy. Compd.*, 2019, **803**, 1119-1126.

7 H. Y. Wang, Y. L. Zhang, Q. Y. Wang, C. W. Jia, P. Cai, G. Chen, C. J. Dong and H. T. Guan, *RSC Adv.*, 2019, **9**, 9126–9135.

8 H. T. Guan, H. Y. Wang, Y. L. Zhang, C. J. Dong, G. Chen, Y. D. Wang and J. B. Xie, *Appl. Surf. Sci.*, 2018, **447**, 261–268.

9 S. Dong, W. K. Tang, P. T. Hu, X. G. Zhao, X. H. Zhang, J. C. Han and P. Hu, *ACS Sustainable Chem. Eng.*, 2019, **7**, 11795-11805.
